# Supplementary material
Source: PubMed Central journal article supplement (PMC4246342)
Supplement: pnas.201418000SI.pdf [file pnas.201418000SI.pdf]

# Supporting Information

Hu et al. 10.1073/pnas.1418000111

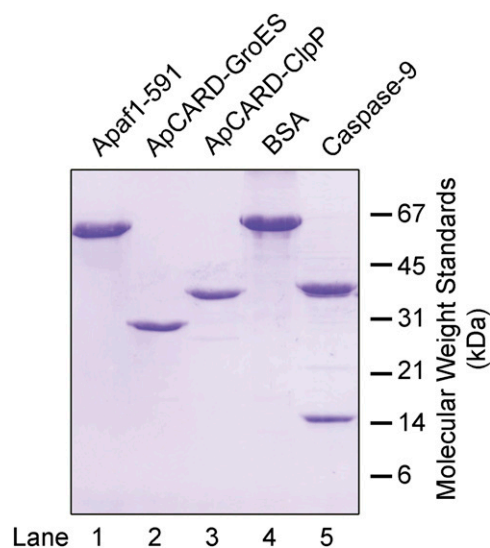

**Fig. S1.** Highly purified, recombinant proteins were used for mechanistic investigation of caspase-9 activation. Shown here is a representative SDS/PAGE gel visualized by Coomassie blue staining. Apaf1-591 contains residues 1–591 of Apaf-1; this protein is sufficient for formation of the apoptosome and subsequent caspase-9 activation (1). ApCARD–GroES is a fusion protein between ApCARD (residues 1–105) and GroES from *Escherichia coli* (residues 1–97). ApCARD–ClpP is a fusion protein between ApCARD (residues 1–105) and ClpP from *E. coli* (residues 1–194). BSA was purchased from Sigma and serves as a negative control. Caspase-9 shown here contains two subunits: p35 (residues 1–315) and p12 (residues 316–416).

1. Riedl SJ, Li W, Chao Y, Schwarzenbacher R, Shi Y (2005) Structure of the apoptotic protease-activating factor 1 bound to ADP. *Nature* 434(7035):926–933.

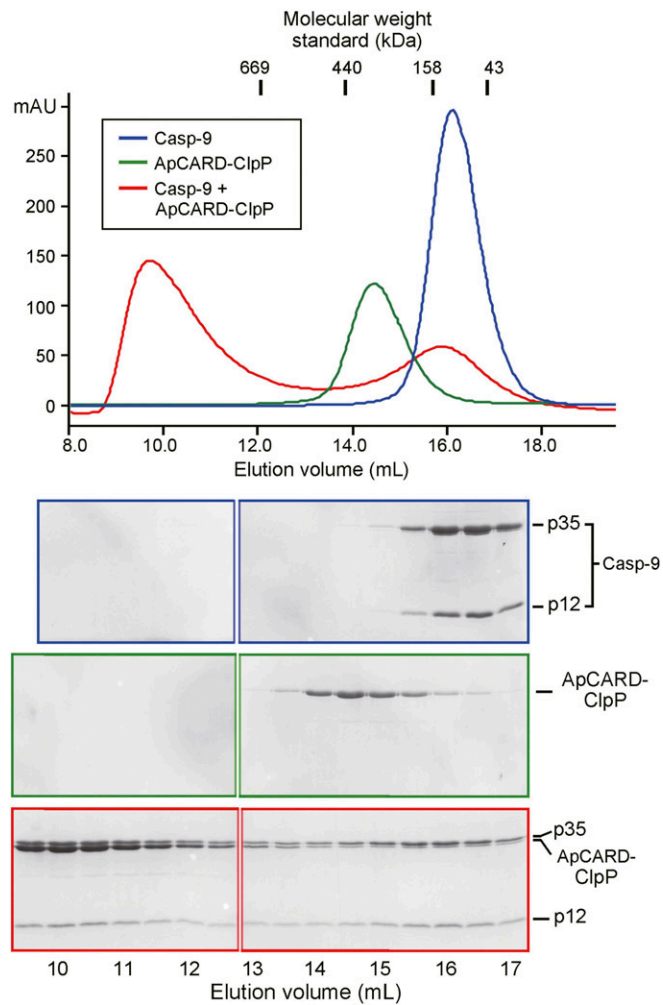

**Fig. S2.** Caspase-9 and the ApCARD-ClpP heptamer form a multimeric complex on gel filtration. (*Upper*) Three gel filtration chromatograms are overlaid. Blue line, caspase-9 alone; green line, ApCARD-ClpP heptamer alone; red line, caspase-9 plus ApCARD-ClpP heptamer. Incubation of caspase-9 with the heptameric ApCARD-ClpP complex resulted in the formation of a multimeric complex. Peak fractions from gel filtration were visualized by SDS/PAGE and Coomassie blue staining.

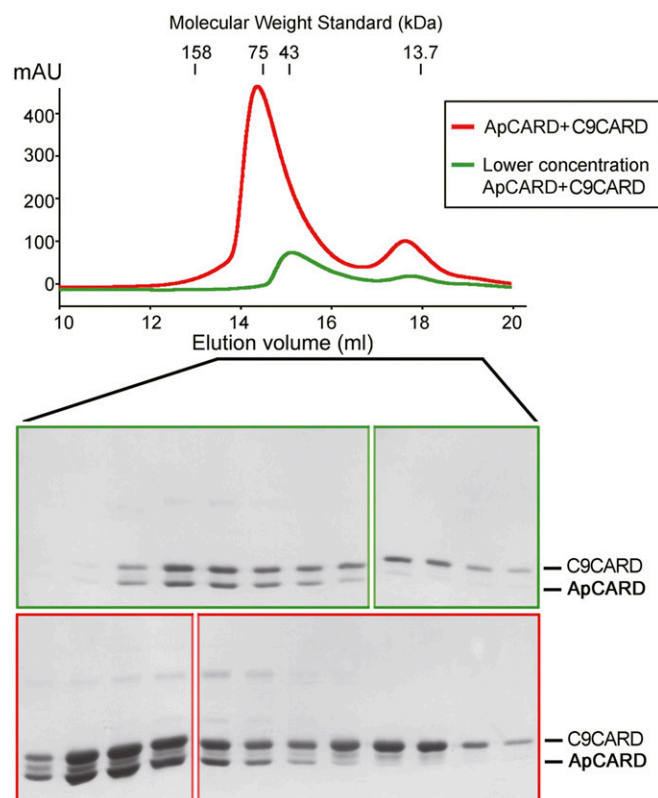

**Fig. S3.** The apparent molecular mass of the ApCARD–C9CARD complex changes in a concentration-dependent manner. Shown here are gel filtration chromatograms (*Upper*) and peak fractions visualized on SDS/PAGE by Coomassie blue staining (*Lower*). At the higher concentration (red line), ApCARD and C9CARD formed a complex with an apparent molecular mass of more than 75 kDa. At the lower concentration (green line), the molecular mass of the ApCARD–C9CARD complex was reduced to ~50 kDa.

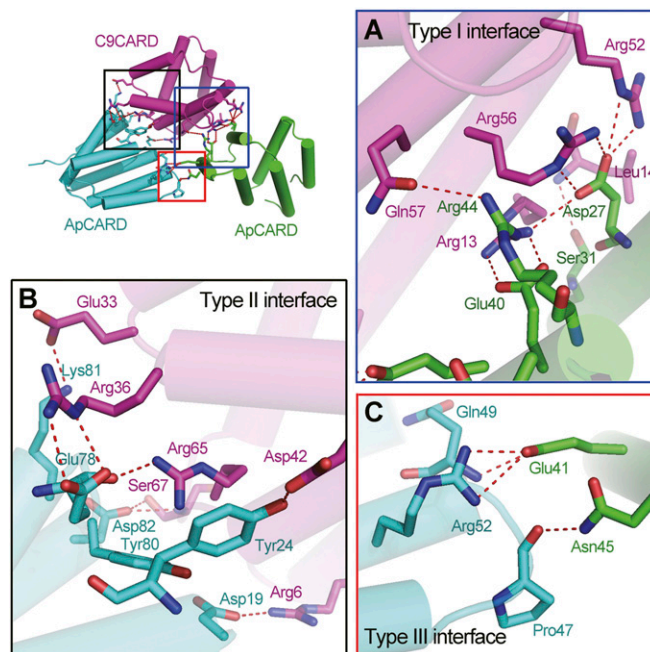

**Fig. 54.** Specific interactions at the three types of interfaces in the ApCARD–C9CARD complex. (A) Close-up view of the type I interface. H-bonds are represented by red dashed lines. The interactions observed here are nearly identical to those reported in the structure of the 1:1 complex between ApCARD and C9CARD (1). (B) Close-up view of the type II interface. Arg36 and Arg65 appear to anchor this interface by each making multiple interactions. The type I and type II interfaces each has a high density of H-bonds. (C) Close-up view of the type III interface.

1. Qin H, et al. (1999) Structural basis of procaspase-9 recruitment by the apoptotic protease-activating factor 1. *Nature* 399(6736):549–557.

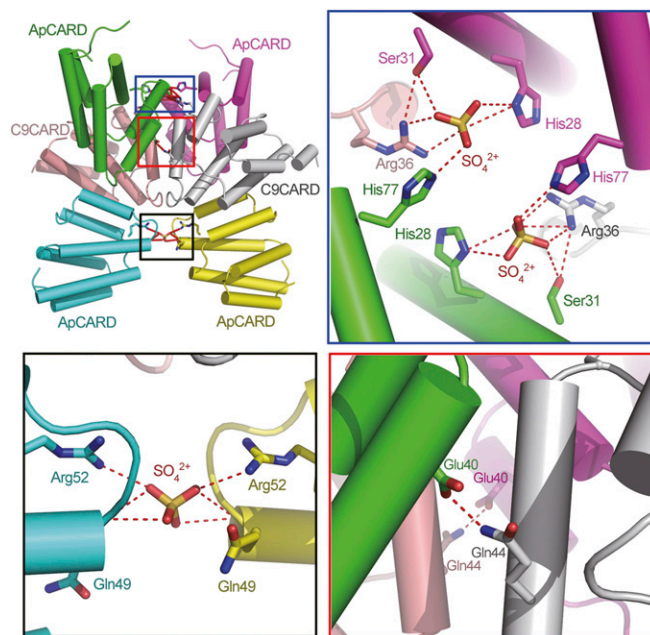

**Fig. 55.** The interface between two basic units of the ApCARD–C9CARD heterotrimer is mainly mediated by sulfate ions. Three close-up views are shown. Three sulfate ions are located at the interface between two basic units of the ApCARD–C9CARD heterotrimer. A large majority of the H-bonds are mediated by these sulfate ions. Notably, two sulfate ions are located close to Ser31 of ApCARD. This observation suggests a possibility that phosphorylation of the solvent-exposed residue Ser31 may modulate CARD assembly.

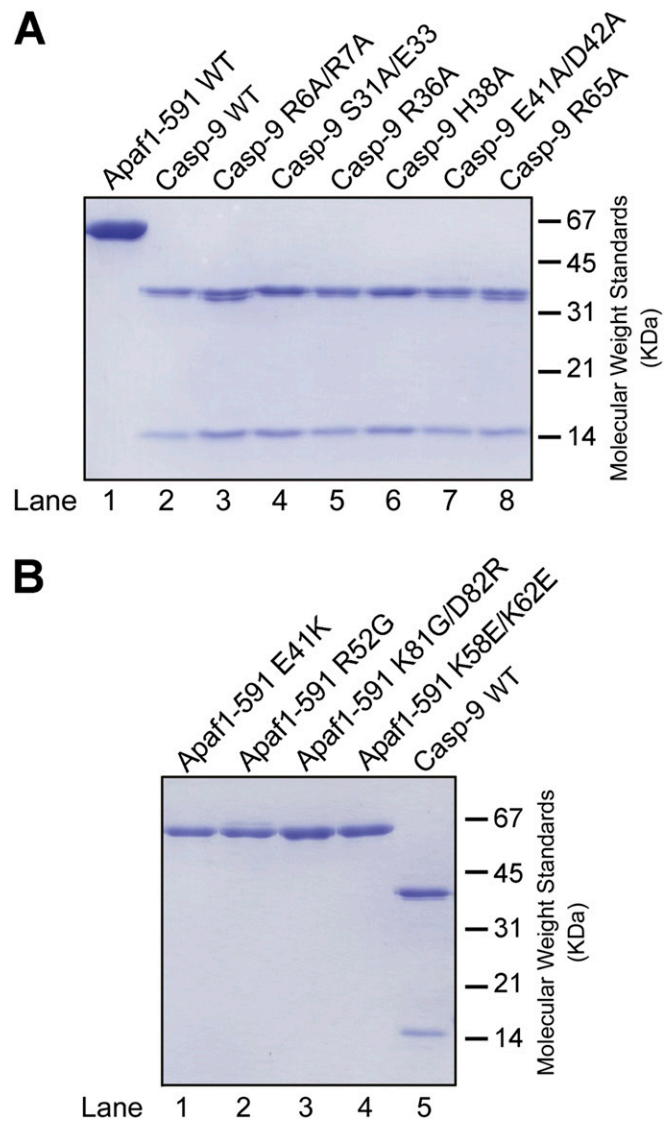

**Fig. S6.** Variants of caspase-9 and Apaf-1 were purified to homogeneity for biochemical characterization. (A) Six variants of caspase-9 were visualized on an SDS/PAGE gel by Coomassie blue staining. Each variant carries one or two missense mutations that target the type II interface. (B) Four variants of Apaf1-591 were visualized on an SDS/PAGE gel by Coomassie blue staining. Each variant carries one or two missense mutations that target the type II or type III interface.

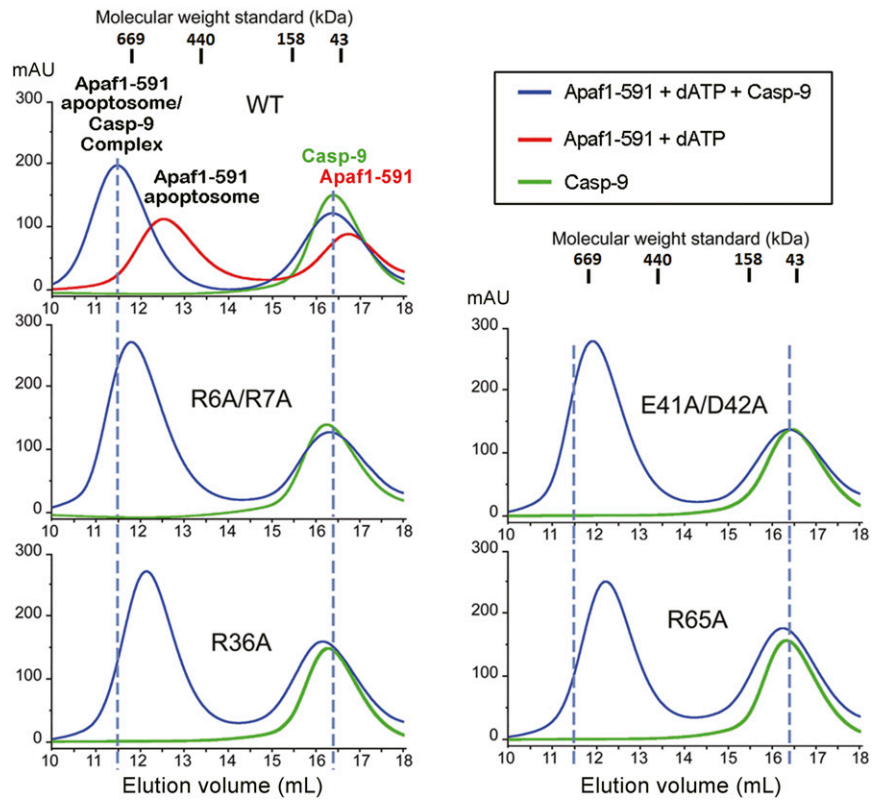

**Fig. S7.** Mutations in caspase-9 that target the type II interface affect formation of a multimeric complex between caspase-9 and the Apaf1-591 apoptosome. Shown here are gel filtration chromatograms for four caspase-9 variants, each with a varying degree of compromised ability to be activated by the Apaf1-591 apoptosome. The apparent molecular mass for each of the complexes between Apaf1-591 and the caspase-9 variants is smaller than that between Apaf1-591 and WT caspase-9.

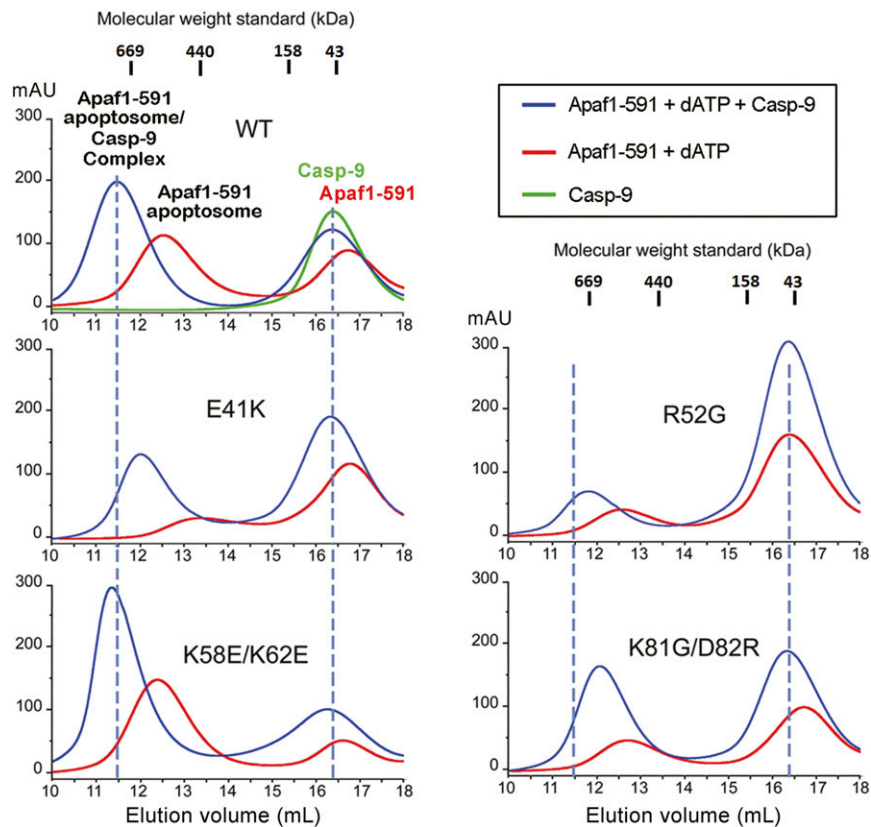

**Fig. S8.** Mutations in Apaf1-591 that target the type II or type III interface affect formation of a multimeric complex between caspase-9 and the Apaf1-591 apoptosome. Shown here are gel filtration chromatograms for four Apaf1-591 variants, each with a varying degree of compromised ability to activate caspase-9. For three variants, the apparent molecular mass for each of the complexes between the Apaf1-591 variant and caspase-9 is smaller than that between WT Apaf1-591 and caspase-9. Notably, for the Apaf1-591 K58E/K62E variant, the apparent molecular mass is nearly identical to that between WT Apaf1-591 and caspase-9. However, despite formation of the multimeric complex between caspase-9 and the Apaf1-591 apoptosome, Apaf1-591 K58E/K62E exhibits a severely compromised ability to activate caspase-9.



**Table S1. Data collection and refinement statistics**

| Data                                     | ApC9                |
|------------------------------------------|---------------------|
| Integration package                      | HKL2000             |
| Space group                              | P2 <sub>1</sub>     |
| Unit cell, Å                             | 64.53, 92.52, 68.03 |
| Unit cell, °                             | 90, 109.12, 90      |
| Wavelength, Å                            | 1.5418              |
| Resolution, Å                            | 30~2.10 (2.18~2.10) |
| R <sub>merge</sub> , %                   | 4.9 (13.6)          |
| I/σ                                      | 22.2 (11.0)         |
| Completeness, %                          | 99.7 (98.7)         |
| No. of measured reflections              | 158,431             |
| No. of unique reflections                | 43,908              |
| Redundancy                               | 3.6 (3.5)           |
| R <sub>work</sub> /R <sub>free</sub> , % | 21.04/22.26         |
| No. atoms                                |                     |
| Protein                                  | 4,584               |
| Main chain                               | 2,264               |
| Side chain                               | 2,320               |
| Water                                    | 355                 |
| Others                                   | 37                  |
| Average B value, Å <sup>2</sup>          |                     |
| Protein                                  | 28.60               |
| Main chain                               | 25.25               |
| Side chain                               | 31.86               |
| Water                                    | 35.90               |
| Others                                   | 46.43               |
| rmsds                                    |                     |
| Bonds, Å                                 | 0.013               |
| Angle, °                                 | 1.123               |
| Ramachandran plot statistics, %          |                     |
| Most favorable                           | 95.6                |
| Additionally allowed                     | 4.4                 |
| Generously allowed                       | 0.0                 |
| Disallowed                               | 0.0                 |

Values in parentheses are for the highest resolution shell.  $R_{merge} = \frac{\sum_h \sum_i |I_h - \bar{I}_h|}{\sum_h \sum_i I_h}$ , where  $I_h$  is the mean intensity of the  $i$  observations of symmetry related reflections of  $h$ .  $R = \frac{\sum |F_{obs} - F_{calc}|}{\sum F_{obs}}$ , where  $F_{calc}$  is the calculated protein structure factor from the atomic model ( $R_{free}$  was calculated with 5% of the reflections selected).
